# Supplementary material for: Age Moderates Link Between Training Effects and Treatment Response to Attention Bias Modification Treatment for Social Anxiety Disorder
Source: Springer Nature journal article supplement (doi:10.1007/s10802-018-0494-7), 2018-11-14

**Age Moderates Link between Training Effects and Treatment Response to Attention Bias Modification Treatment for Social Anxiety Disorder**

**Supplementary Material**

**Methods**

**Participants**

The pooled sample included 99 youth and adult participants (6-50 years; *M*=20.25 years, *SD*=11.13); see Fig. S1 for a histogram depicting the age distribution. Inclusion/exclusion criteria are noted in the main text. Data from nine participants who took part in the Pergamin-Hight et al. (2016; n=4) and Naim et al. (2018; n=5) studies were excluded from analyses since they did not complete the ABMT protocol. This exclusion was based on our focus on outlining ABMT mechanisms during the training protocol with maximal sensitivity (Fergusson, Aaron, Guyatt, & Hebert, 2002), as opposed to a focus on estimating treatment efficacy. CONSORT diagrams appear in the papers reporting the RCTs and are thus not repeated here.

**Descriptive statistics of clinician-rated SAD symptom severity measures**

The means and standard deviations of the pre- and post-ABMT clinician-rated SAD symptoms severity measures (ADIS and LSAS for the youth and adult patient samples, respectively) by treatment condition, are presented in Table S1.

|  | Pre-ABMT |  | Post-ABMT |
| --- | --- | --- | --- |
| **Youth** |  |  |  |
| ACT | 5.9 (1.3) |  | 5.3 (1.4) |
| ABMT | 5.9 (1.2) |  | 4.8 (1.2) |
| **Adults** |  |  |  |
| ACT | 76.0 (13.7) |  | 62.0 (19.8) |
| ABMT | 79.2 (19.5) |  | 53.6 (29.4) |

**Table S1.** Descriptive statistics of pre- and post-ABMT SAD symptom severity levels for the ACT and ABMT conditions in youth and adult patients. Symptom severity was assessed by clinicians using the ADIS in youth patients and the LSAS in adult patients.

Note: ABMT = Attention bias modification treatment; ACT = attention control training; ADIS = Anxiety Disorders Interview Schedule; LSAS = Liebowitz Social Anxiety Scale.

**Data Preparation**

Prior to behavioral analysis, data were first cleaned following standard procedures (Abend et al., 2013; Abend et al., 2014; Lazarov et al., 2017). We first excluded trials with RT <150 ms or >2,000 ms, or incorrect response. Then, for each participant, we calculated mean RT per session, and excluded trials with RTs deviating by >2.5 SDs from the mean. These steps resulted in removal of an average of 6.2% of trials per participant, and this ratio did not differ between the experimental groups (*p*=0.76).

**Results**

**Task performance accuracy**

Mean accuracy during task performance was 95% and above across all sessions and experimental conditions. We observed a main effect of Age Group, *F*(1,95)=13.84, *p*<0.001, η2=0.13, with adult patients performing at a higher mean accuracy across the protocol relative to youth patients (98.1% vs 96.3%, respectively). In addition, we noted a main effect of Training Condition, *F*(1,95)=4.68, *p*=0.033, η2=0.05, whereby ABMT was associated with a lower mean accuracy rate relative to ACT (96.7% vs 97.7%, respectively). Correlations between accuracy levels and normalized gain per session were not significant (all *p*s>0.11), suggesting that learning did not come at the cost of accuracy. Furthermore, a RM-ANOVA of mean accuracy per session (1-8) with Age Group and Training Condition as between-subjects factors did not yield a significant main effect or interaction of Session, all *p*s>0.12, suggesting that accuracy rates did not change over the course of the protocol.

**Additional regression analyses**

An exploratory regression analysis predicted change in SAD symptoms based on gender, learning gains, and training condition (step 1) and their interaction (step 2). For self-reported measures, both step 1, *R2*=0.04, *F*(3,94)=2.63, *p*=0.27, and step 2, *R2*=0.06, *F*(4,93)=1.38, *p*=0.25, yielded non-significant models. For clinician-administered measures, both step 1 and step 2 yielded non-significant, trend-level models, *R2*=0.08, *F*(3,94)=2.63, *p*=0.06, and *R2*=0.09, *F*(4,93)=2.27, *p*=0.07, respectively. In addition, we conducted a regression analysis predicting change in threat bias following treatment, based on gender, learning gains, and training condition (step 1) and their interaction (step 2). This analysis yielded non-significant models for both step 1 and step 2, *R2*=0.01, *F*(3,94)=0.42, *p*=0.74, and, *R2*=0.04, *F*(4,93)=0.95, *p*=0.44, respectively.

**References**

Abend, R., Karni, A., Sadeh, A., Fox, N. A., Pine, D. S., & Bar-Haim, Y. (2013). Learning to attend to threat accelerates and enhances memory consolidation. *PLoS One, 8*(4), e62501. doi:10.1371/journal.pone.0062501 PONE-D-12-39342 [pii]

Abend, R., Pine, D. S., Fox, N. A., & Bar-Haim, Y. (2014). Learning and Memory Consolidation Processes of Attention-Bias Modification in Anxious and Nonanxious Individuals. *Clinical Psychological Science, 2*(5), 620-627.

Burki, C. N., Ludwig, C., Chicherio, C., & de Ribaupierre, A. (2014). Individual differences in cognitive plasticity: an investigation of training curves in younger and older adults. *Psychological Research, 78*(6), 821-835. doi:10.1007/s00426-014-0559-3

Doyon, J., Korman, M., Morin, A., Dostie, V., Hadj Tahar, A., Benali, H., . . . Carrier, J. (2009). Contribution of night and day sleep vs. simple passage of time to the consolidation of motor sequence and visuomotor adaptation learning. *Experimental Brain Research, 195*(1), 15-26. doi:10.1007/s00221-009-1748-y

Eberl, C., Wiers, R. W., Pawelczack, S., Rinck, M., Becker, E. S., & Lindenmeyer, J. (2013). Implementation of Approach Bias Re-Training in Alcoholism-How Many Sessions are Needed? *Alcoholism: Clinical and Experimental Research*. doi:10.1111/acer.12281

Fergusson, D., Aaron, S. D., Guyatt, G., & Hebert, P. (2002). Post-randomisation exclusions: the intention to treat principle and excluding patients from analysis. *BMJ, 325*(7365), 652-654.

Heeren, A., Philippot, P., & Koster, E. H. W. (2015). Impact of the Temporal Stability of Preexistent Attentional Bias for Threat on its Alteration through Attention Bias Modification. *Journal of Behavior Therapy and Experimental Psychiatry, 49*(Part A), 69-75. doi:10.1016/j.jbtep.2014.10.012

Lazarov, A., Abend, R., Seidner, S., Pine, D. S., & Bar-Haim, Y. (2017). The Effects of Training Contingency Awareness during Attention Bias Modification on Learning and Stress Reactivity. *Behavior Therapy, 48*(5), 638-650. doi:<https://doi.org/10.1016/j.beth.2017.03.002>

Naim, R., Kiviti, Y., Bar-Haim, Y., & Huppert, J. (2018). Attention and interpretation bias modification training for social anxiety: A randomized clinical trial of efficacy and synergy. *Journal of Behavior Therapy and Experimental Psychiatry, 59*, 19-30. doi:<https://doi.org/10.1016/j.jbtep.2017.10.006>

Pergamin-Hight, L., Pine, D. S., Fox, N. A., & Bar-Haim, Y. (2016). Attention bias modification for youth with social anxiety disorder. *Journal of Child Psychology and Psychiatry, 57*(11), 1317-1325. doi:10.1111/jcpp.12599

Thomas, K. M., Hunt, R. H., Vizueta, N., Sommer, T., Durston, S., Yang, Y., & Worden, M. S. (2004). Evidence of developmental differences in implicit sequence learning: an fMRI study of children and adults. *Journal of Cognitive Neuroscience, 16*(8), 1339-1351. doi:10.1162/0898929042304688

**Figure Captions**

**Fig. S1.** A stacked histogram depicting the age distribution in the pooled sample by training condition (ABMT or ACT).

*Note*: ABMT = attention bias modification treatment, ACT = attention control training.


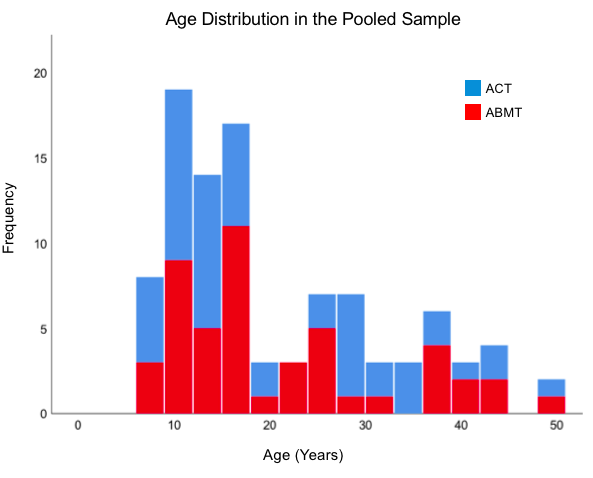

Supplement: MOESM1 [file 16270304]
